# Supplementary material for: Determinants of Response and Intrinsic Resistance to PD-1 Blockade in Microsatellite Instability–High Gastric Cancer
Source: Oxford University Press journal article supplement (doi:10.1158/2159-8290.cd-21-0219), 2021-04-12
Supplement: 21598290cd210219-sup-260791_2_supp_7030638_qqzrs3.xlsx [file 21598290cd210219-sup-260791_2_supp_7030638_qqzrs3.xlsx]

## Sheet: MMR-related
Supplementary Table S3. Genomic mutations in mismatch repair pathway
Patient ID	Best of response	Gene symbol	Chromosome	Position	Reference sequence	Altered sequence	Variant consequence	cDNA change	Amino acid change	dbSNP ID	COSMIC ID	ClinVar ID	CADD score	Pathogenicity
EP68	PR	POLD1	19	50906370	G	-	frameshift_variant	c.1036del	p.W344fs	rs749601227			32	pathogenic
EP78	SD	POLD1	19	50909557	G	A	missense_variant	c.1361G>A	p.R454H	rs1004124075	COSV70957316	RCV000560874	31	pathogenic
EP69	PR	POLD1	19	50912859	C	T	missense_variant	c.2090C>T	p.A697V				29	pathogenic
EP63	SD	POLD1	19	50918799	C	T	missense_variant	c.2669C>T	p.A890V	rs146344351		RCV000473913	23.8	pathogenic
EP72	PR	POLD1	19	50919657	C	T	missense_variant	c.2825C>T	p.P942L	rs1270149320		RCV000691318	27.1	pathogenic
EP80	PR	POLD1	19	50919866	G	-	splice_acceptor_variant	c.2959del					33	pathogenic
EP67	CR	POLE	12	133201360	-	C	frameshift_variant
EP78	SD	POLE	12	133201546	C	A	missense_variant	c.6692G>T	p.S2231I				22.5	pathogenic
EP77	SD	POLE	12	133218275	G	A	missense_variant	c.5336C>T	p.P1779L	rs766086682	COSV57677499		8.685	benign
EP65	PR	POLE	12	133225926	C	A	missense_variant	c.3971G>T	p.R1324L	rs143981093		RCV000230896	25.2	pathogenic
EP76	SD	POLE	12	133241978	C	T	missense_variant	c.2378G>A	p.R793H	rs1422986795	COSV57688915	RCV000650861	24.7	pathogenic
EP69	PR	POLE	12	133245024	G	-	frameshift_variant	c.2091del	p.P697fs	rs752846614		RCV000233420	20	pathogenic
EP64	NE	MSH3	5	79970915	A	-	frameshift_variant	c.1148del	p.K381fs	rs587776701		RCV000822053	28.3	pathogenic
EP65	PR	MSH3	5	79970915	A	-	frameshift_variant	c.1148del	p.K381fs	rs587776701		RCV000822053	28.3	pathogenic
EP69	SD	MSH3	5	79970915	A	-	frameshift_variant	c.1148del	p.K381fs	rs587776701		RCV000822053	28.3	pathogenic
EP72	PR	MSH3	5	79970915	A	-	frameshift_variant	c.1148del	p.K381fs	rs587776701		RCV000822053	28.3	pathogenic
EP75	SD	MSH3	5	79970915	A	-	frameshift_variant	c.1148del	p.K381fs	rs587776701		RCV000822053	28.3	pathogenic
EP76	SD	MSH3	5	79970915	A	-	frameshift_variant	c.1148del	p.K381fs	rs587776701		RCV000822053	28.3	pathogenic
EP77	SD	MSH3	5	79970915	A	-	frameshift_variant	c.1148del	p.K381fs	rs587776701		RCV000822053	28.3	pathogenic
EP79	SD	MSH3	5	79970915	A	-	frameshift_variant	c.1148del	p.K381fs	rs587776701		RCV000822053	28.3	pathogenic
EP78	SD	MSH3	5	79970915	AA	-	frameshift_variant						28.3	pathogenic
EP72	PR	MSH3	5	80169001	G	T	missense_variant	c.3197G>T	p.R1066M		COSV54152064		31	pathogenic
EP76	SD	MSH6	2	48025857	-	A	frameshift_variant
EP77	SD	MSH6	2	48027379	T	C	missense_variant	c.2257T>C	p.S753P				23.2	pathogenic
EP77	SD	MSH6	2	48030640	-	C	frameshift_variant
EP64	NE	MSH6	2	48030640	C	-	frameshift_variant	c.3261del	p.T1085fs	rs267608078	COSV99029757	RCV000491666	24.2	pathogenic
EP69	PR	MSH6	2	48030640	C	-	frameshift_variant	c.3261del	p.T1085fs	rs267608078	COSV99029757	RCV000491666	24.2	pathogenic
EP72	PR	MSH6	2	48030640	C	-	frameshift_variant	c.3261del	p.T1085fs	rs267608078	COSV99029757	RCV000491666	24.2	pathogenic
EP68	PR	MSH6	2	48030692	-	T	frameshift_variant
EP80	PR	MLH1	3	37050377	A	T	missense_variant	c.526A>T	p.I176F	rs1553642761		RCV000560203	29.1	pathogenic
EP72	PR	MLH1	3	37053348	A	-	frameshift_variant	c.588del	p.K195fs	rs63751653	CM151408	RCV000570709	31	pathogenic
EP78	SD	MLH1	3	37070349	C	-	frameshift_variant	c.1489del	p.T495fs	rs63750855	COSV51623024	RCV000557252	24.3	pathogenic
EP80	PR	MLH1	3	37083818	T	C	missense_variant	c.1727T>C	p.L576S		COSV54152064		27.3	pathogenic
EP64	NE	MLH3	14	75483865	C	T	missense_variant	c.4210G>A	p.A1404T				27.3	pathogenic
EP78	SD	MLH3	14	75514435	A	C	missense_variant	c.1924T>G	p.F642V				23.3	pathogenic
EP63	SD	MLH3	14	75514604	T	-	frameshift_variant	c.1755del	p.K585fs	rs751465048			22.4	pathogenic
EP64	NE	MLH3	14	75514604	T	-	frameshift_variant	c.1755del	p.K585fs	rs751465048			22.4	pathogenic
EP71	PD	MLH3	14	75514604	T	-	frameshift_variant	c.1755del	p.K585fs	rs751465048			22.4	pathogenic
EP78	SD	PMS1	2	190670417	A	G	intron_variant,NMD_transcript_variant	c.315+9740A>G					25.1	pathogenic
EP64	NE	PMS2	7	6027157	T	-	frameshift_variant	c.1239del	p.K413fs		CD040607
EP81	SD	PMS2	7	6027157	T	-	frameshift_variant	c.1239del	p.K413fs		CD040607
EP78	SD	PMS2	7	6031649	G	A	stop_gained	c.943C>T	p.R315*	rs200640585	CM102797	RCV000148734	39	pathogenic
EP77	SD	EXO1	1	242042052	T	-	frameshift_variant,splice_region_variant	c.1522del	p.F506fs	rs763386152			32	pathogenic
EP78	SD	EXO1	1	242042520	G	T	missense_variant	c.1984G>T	p.D662Y		COSV62219177		23.3	pathogenic
